# Supplementary material
Source: MDPI journal article supplement (https://www.mdpi.com/2071-1050/7/7/8855)
Supplement: s1 [file s1]

*Supplementary Information*

## **Conservation Messages in Speech Bubbles—Evaluation of An Environmental Education Comic Distributed in Elementary Schools on Madagascar. *Sustainability* 2015, 7, 8855-8880**

**Torsten Richter**<sup>1,†,\*</sup>, **Antje Rendigs**<sup>2,†</sup> and **Claudette Patricia Maminirina**<sup>3</sup>

<sup>1</sup> University of Hildesheim, Ecology and Environmental Education Group, Institute of Biology and Chemistry, Marienburger Platz 22, 31141 Hildesheim, Germany

<sup>2</sup> Madagascar Wildlife Conservation–Deutschland, Postfach 6108, 30061 Hannover, Germany; E-Mail: antjarendigs@posteo.de

<sup>3</sup> Institut Supérieur de Technologie d’Ambositra, Ex-Bâtiment HODIMA, Ankonombe, Ambositra 306, Madagascar; E-Mail: claudette.maminirina@gmail.com

† These authors contributed equally to this work.

\* Author to whom correspondence should be addressed; E-Mail: torsten.richter@uni-hildesheim.de; Tel.: +49-(0)-5121-883-40724; Fax: +49-(0)-5121-883-40701.

---

Table S1. Bandro questions.

| Questions                                        | Time                    |            | Controll Group |       | Comic Group |       | Comic plus add. Material Group |       |       |
|--------------------------------------------------|-------------------------|------------|----------------|-------|-------------|-------|--------------------------------|-------|-------|
|                                                  |                         |            | Right          | Wrong | Right       | Wrong | Right                          | Wrong |       |
| Which environment prefer Bandros to move around? | T0                      | Number     | 224            | 27    | 99          | 32    | 109                            | 36    |       |
|                                                  |                         | Percentage | 89.2%          | 10.8% | 75.6%       | 24.4% | 75.2%                          | 24.8% |       |
|                                                  | T1                      | Number     | 219            | 27    | 122         | 13    | 130                            | 3     |       |
|                                                  |                         | Percentage | 89.0%          | 11.0% | 90.4%       | 9.6%  | 97.7%                          | 2.3%  |       |
|                                                  | T2                      | Number     | 104            | 4     | 72          | 6     | 35                             | 3     |       |
|                                                  |                         | Percentage | 96.3%          | 3.7%  | 92.3%       | 7.7%  | 92.1%                          | 7.9%  |       |
|                                                  | Where lives the Bandro? | T0         | Number         | 224   | 29          | 111   | 27                             | 125   | 23    |
|                                                  |                         |            | Percentage     | 88.5% | 11.5%       | 80.4% | 19.6%                          | 84.5% | 15.5% |
| T1                                               |                         | Number     | 214            | 33    | 126         | 10    | 130                            | 5     |       |
|                                                  |                         | Percentage | 86.6%          | 13.4% | 92.6%       | 7.4%  | 96.3%                          | 3.7%  |       |
| T2                                               |                         | Number     | 108            | 0     | 78          | 4     | 37                             | 1     |       |
|                                                  |                         | Percentage | 100%           | 0.0%  | 94.9%       | 5.1%  | 97.4%                          | 2.6%  |       |

Table S1. *Cont.*

| Questions                                    | Time                                                |            | Controll Group |       | Comic Group |       | Comic plus add. Material Group |       |      |
|----------------------------------------------|-----------------------------------------------------|------------|----------------|-------|-------------|-------|--------------------------------|-------|------|
|                                              |                                                     |            | Right          | Wrong | Right       | Wrong | Right                          | Wrong |      |
| What kind of food does the Bandro depend on? | T0                                                  | Number     | 227            | 26    | 122         | 17    | 116                            | 75    |      |
|                                              |                                                     | Percentage | 89.7%          | 10.3% | 87.8%       | 12.2% | 78.4%                          | 21.6% |      |
|                                              | T1                                                  | Number     | 222            | 25    | 127         | 8     | 134                            | 1     |      |
|                                              |                                                     | Percentage | 89.9%          | 10.1% | 94.1%       | 5.9%  | 99.3%                          | 0.7%  |      |
|                                              | T2                                                  | Number     | 99             | 9     | 78          | 1     | 38                             | 0     |      |
|                                              |                                                     | Percentage | 91.7%          | 8.3%  | 98.7%       | 1.3%  | 100%                           | 0.0%  |      |
|                                              | Why have Bandros to roam freely within the marshes? | T0         | Number         | 234   | 16          | 121   | 14                             | 133   | 14   |
|                                              |                                                     |            | Percentage     | 93.6% | 6.4%        | 89.6% | 10.4%                          | 90.5% | 9.5% |
| T1                                           |                                                     | Number     | 229            | 17    | 127         | 9     | 132                            | 3     |      |
|                                              |                                                     | Percentage | 93.1%          | 6.9%  | 93.4%       | 6.6%  | 97.8%                          | 2.2%  |      |
| T2                                           |                                                     | Number     | 107            | 0     | 78          | 0     | 36                             | 0     |      |
|                                              |                                                     | Percentage | 100%           | 0.0%  | 100%        | 0.0%  | 100%                           | 0.0%  |      |

Table S1. *Cont.*

| Questions                                                | Time |            | Controll Group |       | Comic Group |       | Comic plus add. Material Group |       |
|----------------------------------------------------------|------|------------|----------------|-------|-------------|-------|--------------------------------|-------|
|                                                          |      |            | Right          | Wrong | Right       | Wrong | Right                          | Wrong |
| Is ist allowed to capture Bandros and keep them as pets? | T0   | Number     | 231            | 40    | 115         | 22    | 124                            | 24    |
|                                                          |      | Percentage | 84.2%          | 15.8% | 83.9%       | 16.1% | 83.8%                          | 16.2% |
|                                                          | T1   | Number     | 200            | 46    | 124         | 10    | 125                            | 10    |
|                                                          |      | Percentage | 81.3%          | 18.7% | 92.5%       | 7.5%  | 92.6%                          | 7.4%  |
|                                                          | T2   | Number     | 105            | 2     | 73          | 6     | 36                             | 2     |
|                                                          |      | Percentage | 98.1%          | 1.9%  | 92.4%       | 7.6%  | 94.7%                          | 5.3%  |
| The Bandro is famous in the Alaotra region because...    | T0   | Number     | 185            | 67    | 83          | 52    | 89                             | 58    |
|                                                          |      | Percentage | 73.4%          | 26.6% | 61.5%       | 38.5% | 60.5%                          | 39.5% |
|                                                          | T1   | Number     | 180            | 66    | 104         | 32    | 121                            | 14    |
|                                                          |      | Percentage | 73.2%          | 26.8% | 76.5%       | 23.5% | 89.6%                          | 10.4% |
|                                                          | T2   | Number     | 98             | 10    | 69          | 10    | 37                             | 1     |
|                                                          |      | Percentage | 90.7%          | 9.3%  | 87.3%       | 12.7% | 97.4%                          | 2.6%  |

**Table S2.** Environmental questions.

| Questions                                                             | Time |            | Controll Group |       | Comic Group |       | Comic plus add. Material Group |       |
|-----------------------------------------------------------------------|------|------------|----------------|-------|-------------|-------|--------------------------------|-------|
|                                                                       |      |            | Right          | Wrong | Right       | Wrong | Right                          | Wrong |
| What can we do to help the animals in the zetra (marshes) to survive? | T0   | Number     | 186            | 54    | 94          | 34    | 97                             | 40    |
|                                                                       |      | Percentage | 77.5%          | 22.5% | 73.4%       | 26.6% | 70.8%                          | 29.2% |
|                                                                       | T1   | Number     | 200            | 42    | 112         | 18    | 117                            | 16    |
|                                                                       |      | Percentage | 82.6%          | 17.4% | 86.2%       | 13.8% | 88.0%                          | 12.0% |
|                                                                       | T2   | Number     | 102            | 6     | 72          | 7     | 37                             | 1     |
|                                                                       |      | Percentage | 94.4%          | 5.6%  | 91.1%       | 8.9%  | 97.4%                          | 2.6%  |
| What importance has the zetra (marsh) for wildlife?                   | T0   | Number     | 199            | 45    | 81          | 49    | 102                            | 39    |
|                                                                       |      | Percentage | 81.6%          | 18.4% | 62.3%       | 37.7% | 72.3%                          | 27.7% |
|                                                                       | T1   | Number     | 215            | 31    | 107         | 28    | 121                            | 12    |
|                                                                       |      | Percentage | 87.4%          | 12.6% | 79.3%       | 20.7% | 91.0%                          | 9.0%  |
|                                                                       | T2   | Number     | 99             | 9     | 68          | 9     | 37                             | 1     |
|                                                                       |      | Percentage | 91.7%          | 8.3%  | 88.3%       | 11.7% | 97.4%                          | 2.6%  |

Table S2. *Cont.*

| Questions                                     | Time |            | Controll Group |       | Comic Group |       | Comic plus add. Material Group |       |
|-----------------------------------------------|------|------------|----------------|-------|-------------|-------|--------------------------------|-------|
|                                               |      |            | Right          | Wrong | Right       | Wrong | Right                          | Wrong |
| Forests are good for...                       | T0   | Number     | 185            | 59    | 84          | 48    | 78                             | 62    |
|                                               |      | Percentage | 75.8%          | 24.2% | 63.6%       | 36.4% | 55.7%                          | 44.3% |
|                                               | T1   | Number     | 181            | 62    | 99          | 36    | 97                             | 37    |
|                                               |      | Percentage | 74.5%          | 25.5% | 73.3%       | 26.7% | 72.4%                          | 27.6% |
|                                               | T2   | Number     | 92             | 16    | 63          | 16    | 28                             | 10    |
|                                               |      | Percentage | 85.2%          | 14.8% | 79.7%       | 20.3% | 73.7%                          | 26.3% |
| Why are the trees on the hills so important ? | T0   | Number     | 160            | 86    | 64          | 57    | 76                             | 69    |
|                                               |      | Percentage | 65.0%          | 35.0% | 52.9%       | 47.1% | 52.4%                          | 47.6% |
|                                               | T1   | Numbe      | 195            | 51    | 86          | 49    | 111                            | 23    |
|                                               |      | Percentage | 79.3%          | 20.7% | 63.7%       | 36.3% | 82.8%                          | 17.2% |
|                                               | T2   | Number     | 100            | 8     | 63          | 16    | 36                             | 2     |
|                                               |      | Percentage | 92.6%          | 7.4%  | 79.7%       | 20.3% | 94.7%                          | 5.3%  |

Table S2. *Cont.*

| Questions                                                                           | Time |            | Controll Group |       | Comic Group |       | Comic plus add. Material Group |       |
|-------------------------------------------------------------------------------------|------|------------|----------------|-------|-------------|-------|--------------------------------|-------|
|                                                                                     |      |            | Right          | Wrong | Right       | Wrong | Right                          | Wrong |
| What happens when the soil is washed away from the surrounding hills into the lake? | T0   | Number     | 71             | 179   | 34          | 102   | 32                             | 113   |
|                                                                                     |      | Percentage | 28.4%          | 71.6% | 25.0%       | 75.0% | 22.1%                          | 77.9% |
|                                                                                     | T1   | Number     | 109            | 138   | 55          | 81    | 83                             | 52    |
|                                                                                     |      | Percentage | 44.1%          | 55.9% | 40.4%       | 59.6% | 61.5%                          | 38.5% |
|                                                                                     | T2   | Number     | 63             | 45    | 35          | 44    | 30                             | 8     |
|                                                                                     |      | Percentage | 58.3%          | 41.7% | 44.3%       | 55.7% | 78.9%                          | 21.1% |
| Are the birds from the forest good as pet animals?                                  | T0   | Number     | 179            | 72    | 96          | 42    | 76                             | 65    |
|                                                                                     |      | Percentage | 71.3%          | 28.7% | 69.6%       | 30.4% | 53.9%                          | 46.1% |
|                                                                                     | T1   | Number     | 182            | 64    | 110         | 26    | 104                            | 31    |
|                                                                                     |      | Percentage | 74.0%          | 26.0% | 80.9%       | 19.1% | 77.0%                          | 23.0% |
|                                                                                     | T2   | Number     | 95             | 13    | 74          | 5     | 34                             | 4     |
|                                                                                     |      | Percentage | 88.0%          | 12.0% | 93.7%       | 6.3%  | 89.5%                          | 10.5% |

Table S2. *Cont.*

| Questions                                              | Time |            | Controll Group |       | Comic Group |       | Comic plus add. Material Group |       |
|--------------------------------------------------------|------|------------|----------------|-------|-------------|-------|--------------------------------|-------|
|                                                        |      |            | Right          | Wrong | Right       | Wrong | Right                          | Wrong |
| Not only humans eat fish. Which animal eats fish, too? | T0   | Number     | 85             | 167   | 51          | 84    | 50                             | 94    |
|                                                        |      | Percentage | 33.7%          | 66.3% | 37.8%       | 62.2% | 34.7%                          | 65.3% |
|                                                        | T1   | Number     | 96             | 149   | 82          | 54    | 85                             | 50    |
|                                                        |      | Percentage | 39.2%          | 60.8% | 60.3%       | 39.7% | 63.0%                          | 37.0% |
|                                                        | T2   | Number     | 56             | 52    | 56          | 23    | 22                             | 16    |
|                                                        |      | Percentage | 51.9%          | 48.1% | 70.9%       | 29.1% | 57.9%                          | 42.1% |
| Should we burn the zetra (marshes)?                    | T0   | Number     | 169            | 81    | 74          | 60    | 83                             | 63    |
|                                                        |      | Percentage | 67.6%          | 32.4% | 55.2%       | 44.8% | 56.8%                          | 43.2% |
|                                                        | T1   | Number     | 178            | 68    | 98          | 38    | 111                            | 24    |
|                                                        |      | Percentage | 72.4%          | 27.6% | 72.1%       | 27.9% | 82.2%                          | 17.8% |
|                                                        | T2   | Number     | 98             | 10    | 68          | 11    | 36                             | 2     |
|                                                        |      | Percentage | 90.7%          | 9.3%  | 86.1%       | 13.9% | 94.7%                          | 5.3%  |



Table S2. *Cont.*

| Questions                                      | Time |            | Controll Group |       | Comic Group |       | Comic plus add. Material Group |       |
|------------------------------------------------|------|------------|----------------|-------|-------------|-------|--------------------------------|-------|
|                                                |      |            | Right          | Wrong | Right       | Wrong | Right                          | Wrong |
| What use has zozoro<br>(papyrus)?              | T0   | Number     | 200            | 51    | 91          | 43    | 112                            | 34    |
|                                                |      | Percentage | 79.7%          | 20.3% | 67.9%       | 32.1% | 76.7%                          | 23.3% |
|                                                | T1   | Number     | 198            | 47    | 104         | 31    | 124                            | 11    |
|                                                |      | Percentage | 80.8%          | 19.2% | 77.0%       | 23.0% | 91.9%                          | 8.1%  |
|                                                | T2   | Number     | 99             | 9     | 67          | 12    | 38                             | 0     |
|                                                |      | Percentage | 91.7%          | 8.3%  | 84.8%       | 15.2% | 100%                           | 0.0%  |
| Why need also the<br>fishes the zetra (marsh)? | T0   | Number     | 125            | 126   | 47          | 89    | 64                             | 82    |
|                                                |      | Percentage | 49.8%          | 50.2% | 34.6%       | 65.4% | 43.8%                          | 56.2% |
|                                                | T1   | Number     | 125            | 120   | 70          | 66    | 76                             | 59    |
|                                                |      | Percentage | 51.0%          | 49.0% | 25.8%       | 48.5% | 56.3%                          | 43.7% |
|                                                | T2   | Number     | 47             | 61    | 34          | 45    | 29                             | 9     |
|                                                |      | Percentage | 43.5%          | 56.5% | 43.0%       | 57.0% | 76.3%                          | 23.7% |

**Table S3.** Lemur questions.

| <b>Have you ever seen a lemur?</b><br><b>(n = 1269)</b> |              | <b>Where are lemurs only to be found?</b><br><b>(n = 1279)</b> |              | <b>Are lemurs protected by law?</b><br><b>(n = 1266)</b> |              |
|---------------------------------------------------------|--------------|----------------------------------------------------------------|--------------|----------------------------------------------------------|--------------|
| Yes                                                     | 299<br>23.6% | Lake Alaotra                                                   | 792<br>61.9% | Yes                                                      | 749<br>59.2% |
| No                                                      | 822<br>64.8% | Madagascar                                                     | 100<br>7.8%  | No                                                       | 285<br>22.5% |
| Not sure                                                | 148<br>11.7% | Africa                                                         | 387<br>30.3% | Not sure                                                 | 232<br>18.3% |

| <b>Questions</b>                  | <b>Time</b> | <b>Controll Group</b> |           |                 | <b>Comic Group</b> |           |                 | <b>Comic plus add. material Group</b> |           |                 |       |
|-----------------------------------|-------------|-----------------------|-----------|-----------------|--------------------|-----------|-----------------|---------------------------------------|-----------|-----------------|-------|
|                                   |             | <b>Yes</b>            | <b>No</b> | <b>Not sure</b> | <b>Yes</b>         | <b>No</b> | <b>Not sure</b> | <b>Yes</b>                            | <b>No</b> | <b>Not sure</b> |       |
| Have you<br>ever seen a<br>lemur? | T0          | Number                | 75        | 146             | 29                 | 21        | 84              | 29                                    | 21        | 102             | 24    |
|                                   |             | Percentage            | 30.0%     | 58.4%           | 11.6%              | 15.7%     | 62.7%           | 21.6%                                 | 14.3%     | 69.4%           | 16.3% |
|                                   | T1          | Number                | 43        | 175             | 25                 | 41        | 76              | 18                                    | 61        | 71              | 3     |
|                                   |             | Percentage            | 17.7%     | 72.0%           | 10.3%              | 30.4%     | 56.3%           | 13.3%                                 | 45.2%     | 52.6%           | 2.2%  |
|                                   | T2          | Number                | 8         | 89              | 11                 | 12        | 62              | 5                                     | 17        | 17              | 4     |
|                                   |             | Percentage            | 7.4%      | 82.4%           | 10.2%              | 15.2%     | 78.5%           | 6.3%                                  | 44.7%     | 44.7%           | 10.5% |

Table S3. *Cont.*

| Questions                          | Time | Controll Group |            |          | Comic Group  |            |          | Comic plus add. material Group |            |          |       |
|------------------------------------|------|----------------|------------|----------|--------------|------------|----------|--------------------------------|------------|----------|-------|
|                                    |      | Yes            | No         | Not sure | Yes          | No         | Not sure | Yes                            | No         | Not sure |       |
|                                    |      | Lake Alaotra   | Madagascar | Africa   | Lake Alaotra | Madagascar | Africa   | Lake Alaotra                   | Madagascar | Africa   |       |
| Where are lemurs only to be found? | T0   | Number         | 147        | 19       | 86           | 67         | 27       | 42                             | 68         | 15       | 65    |
|                                    |      | Percentage     | 58.3%      | 7.5%     | 34.1%        | 49.3%      | 19.9%    | 30.9%                          | 45.9%      | 10.1%    | 43.9% |
|                                    | T1   | Number         | 175        | 12       | 60           | 105        | 5        | 26                             | 93         | 5        | 37    |
|                                    |      | Percentage     | 70.9%      | 4.9%     | 24.3%        | 77.2%      | 3.7%     | 19.1%                          | 68.9%      | 3.7%     | 27.4% |
|                                    | T2   | Number         | 53         | 8        | 47           | 56         | 7        | 16                             | 28         | 2        | 8     |
|                                    |      | Percentage     | 49.1%      | 7.4%     | 43.5%        | 70.9%      | 8.9%     | 20.3%                          | 73.7%      | 5.3%     | 21.1% |
|                                    |      | Yes            | No         | Not sure | Yes          | No         | Not sure | Yes                            | No         | Not sure |       |
| Are lemurs protected by law?       | T0   | Number         | 159        | 49       | 43           | 54         | 42       | 39                             | 39         | 75       | 32    |
|                                    |      | Percentage     | 63.3%      | 19.5%    | 17.1%        | 40.0%      | 31.1%    | 28.9%                          | 26.7%      | 51.4%    | 21.9% |
|                                    | T1   | Number         | 154        | 49       | 42           | 79         | 21       | 33                             | 109        | 14       | 11    |
|                                    |      | Percentage     | 62.9%      | 20.0%    | 17.1%        | 59.4%      | 15.8%    | 24.8%                          | 81.3%      | 10.4%    | 8.2%  |
|                                    | T2   | Number         | 69         | 16       | 22           | 55         | 15       | 8                              | 31         | 4        | 2     |
|                                    |      | Percentage     | 64.5%      | 15.0%    | 20.6%        | 70.5%      | 19.2%    | 10.3%                          | 83.8%      | 10.8%    | 5.4%  |
